# Supplementary material
Source: PubMed Central journal article supplement (PMC3632095)
Supplement: NIHMS401707-supplement-01.pdf [file NIHMS401707-supplement-01.pdf]

a: Control

b: Radiation

c: Radiation+LPS

IL-1 $\alpha$   
12  
Weeks

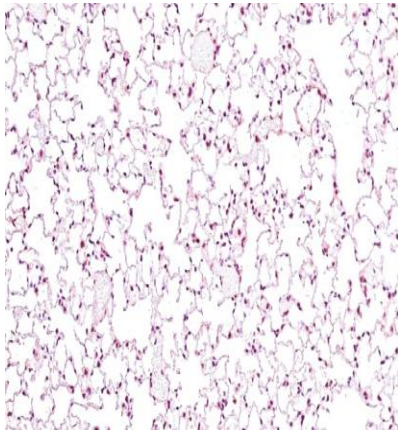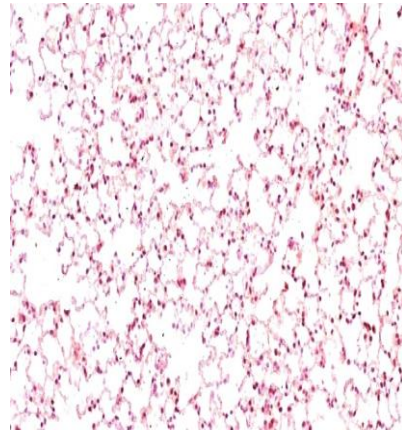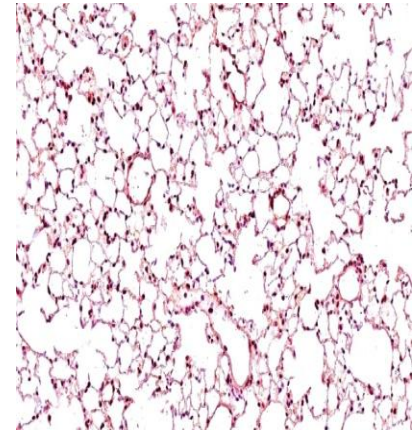

IL-1 $\alpha$   
24  
Weeks

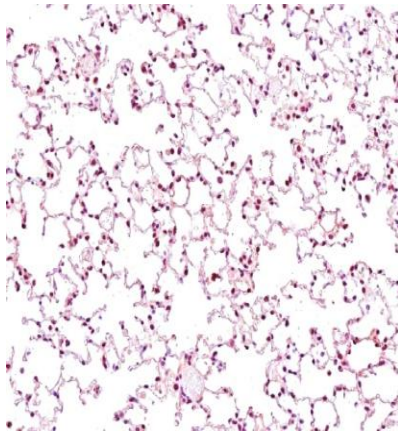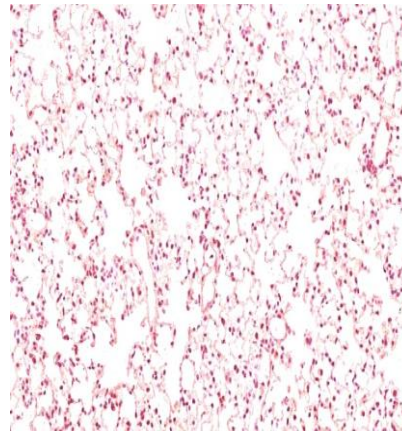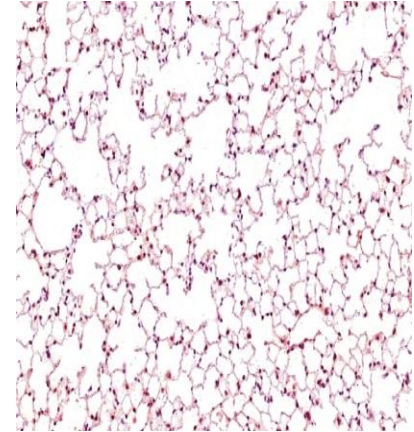

IL-1 $\beta$   
12  
Weeks

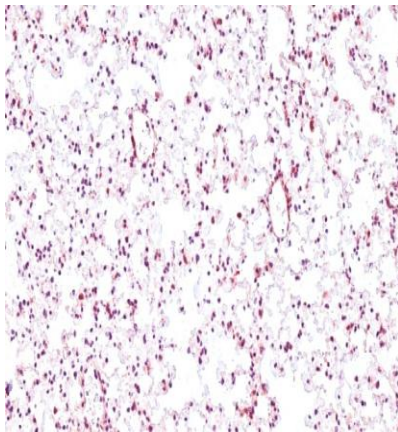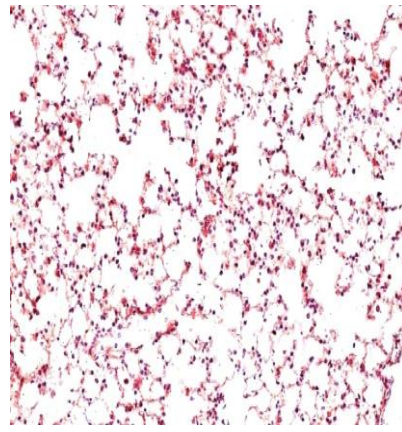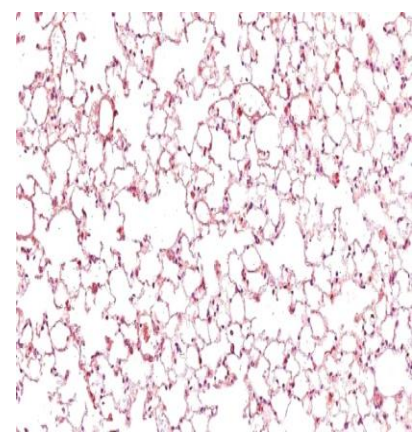

IL-1 $\beta$   
24  
Weeks

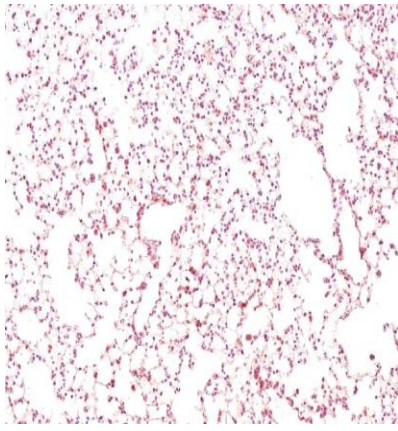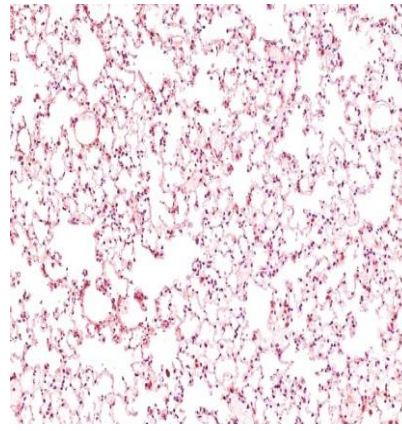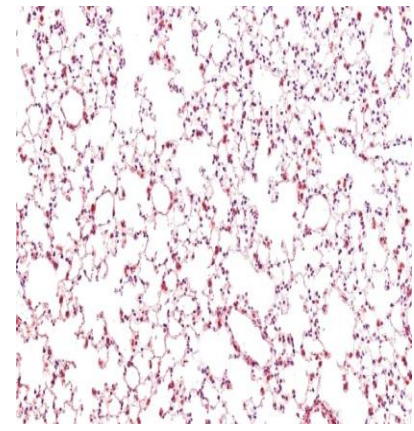

Supplementary Figure 1A

a: Control

b: Radiation

c: Radiation+LPS

IL-6  
12  
Weeks

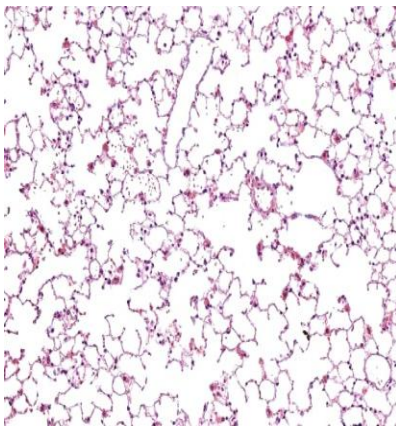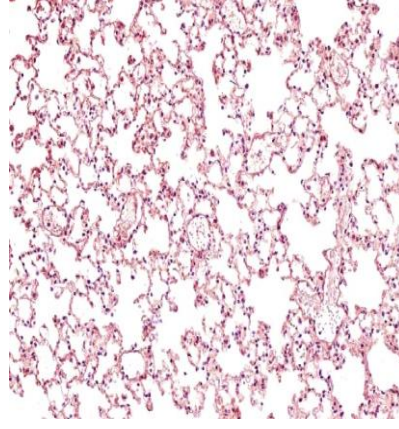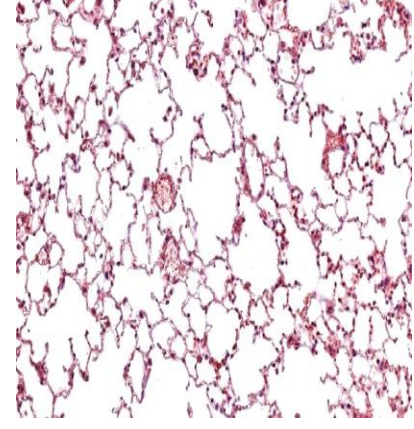

IL-6  
24  
Weeks

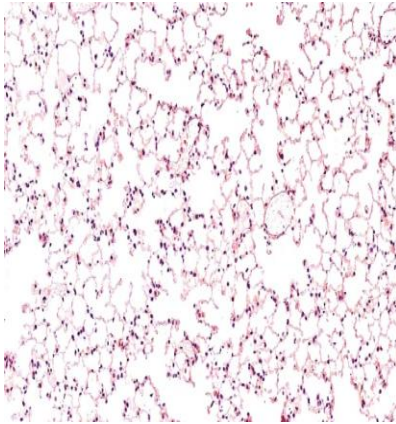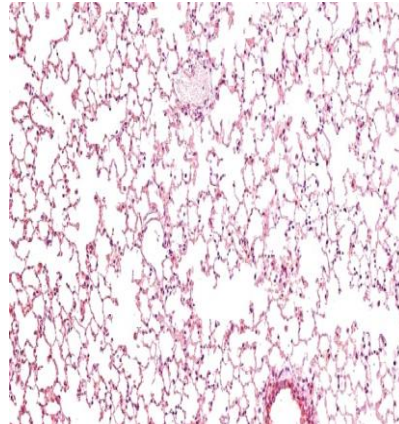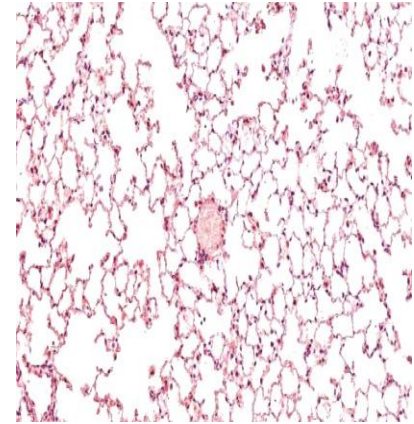

TNF  $\alpha$   
12  
Weeks

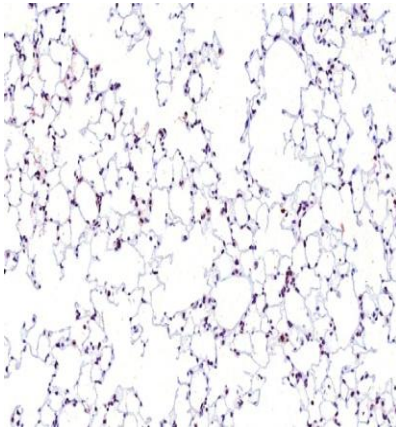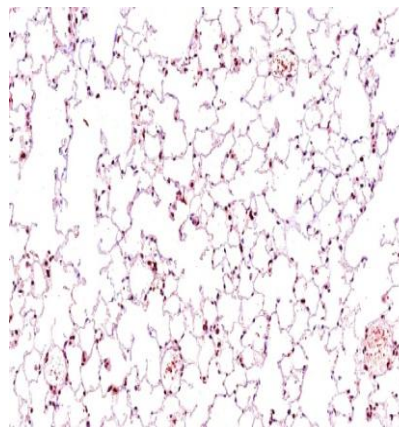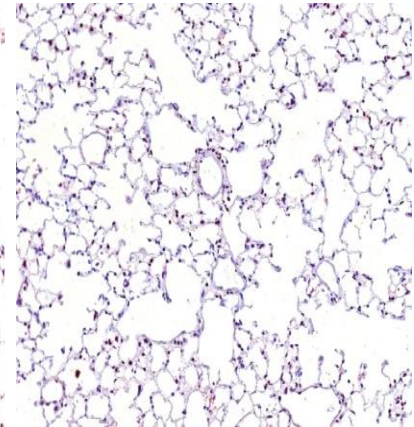

TNF  $\alpha$   
24  
Weeks

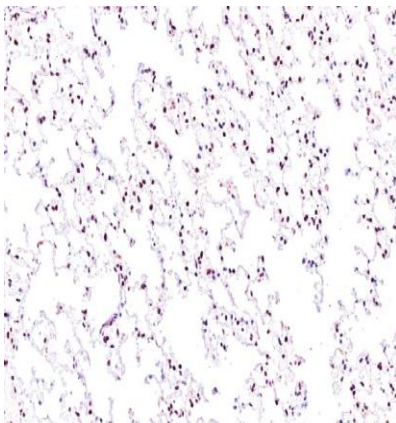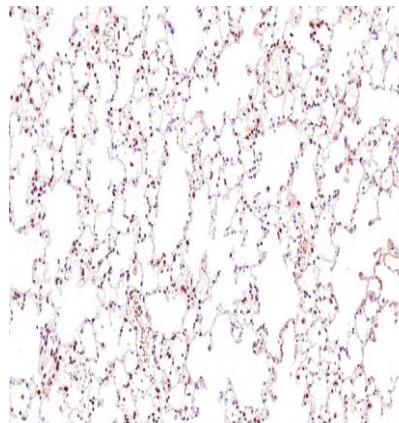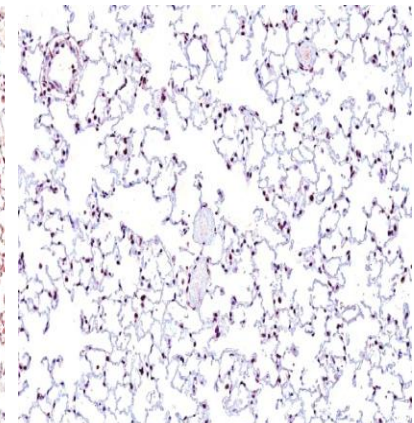

Supplementary Figure 1B

a: Control

b: Radiation

c: Radiation+LPS

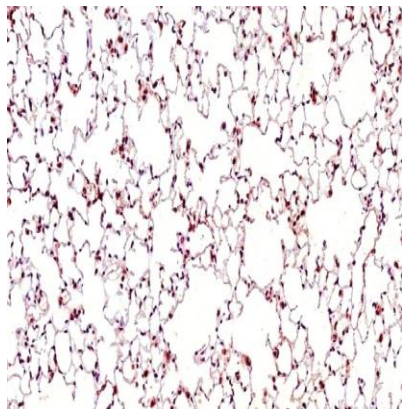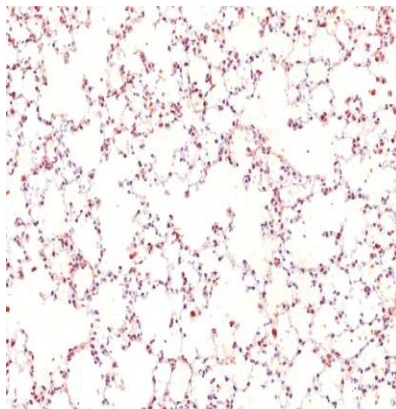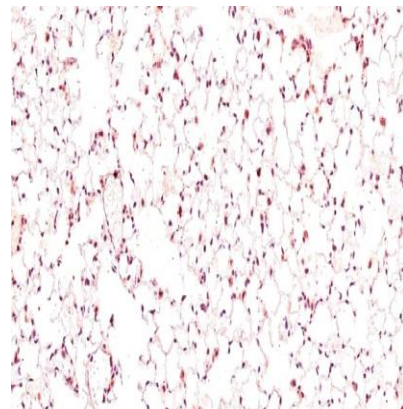

TGF  $\beta$   
12  
Weeks

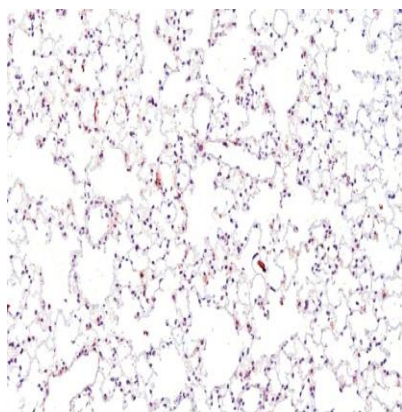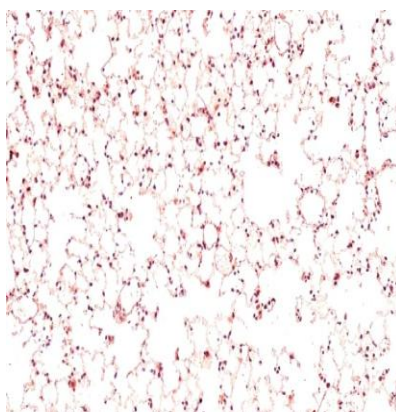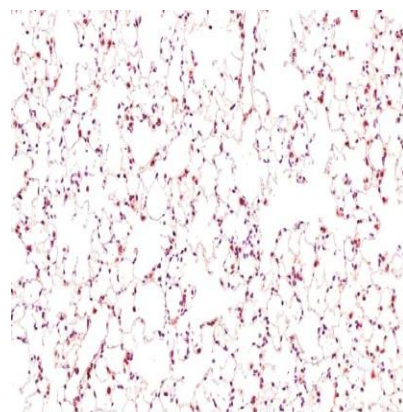

TGF  $\beta$   
24  
Weeks

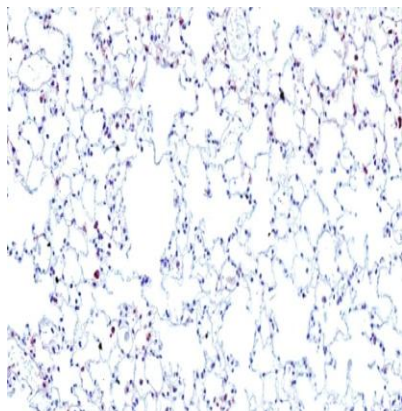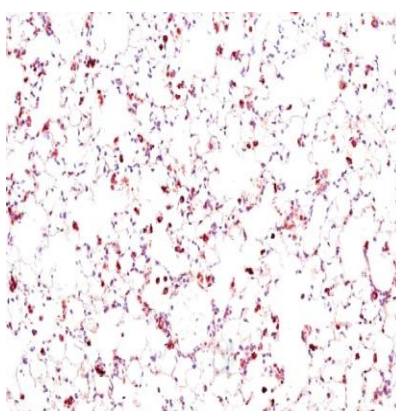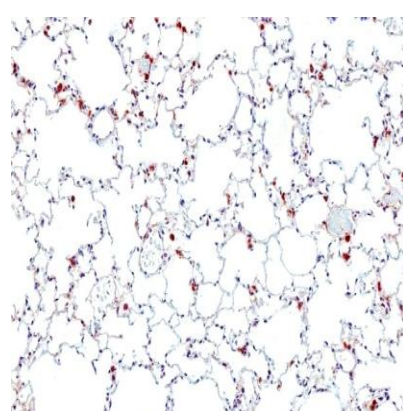

MAC-3  
12  
Weeks

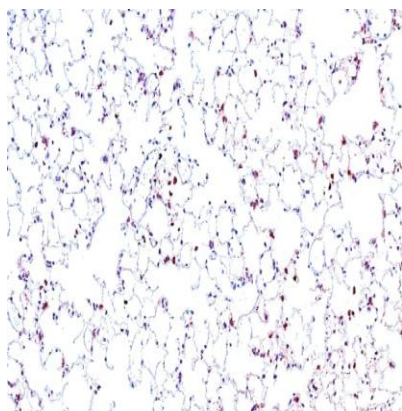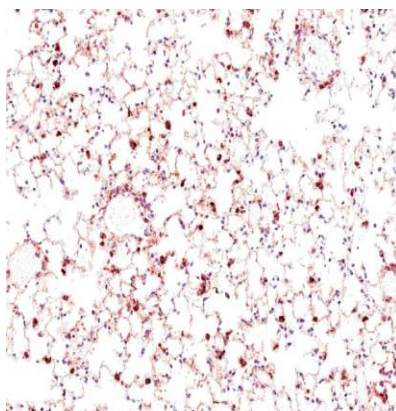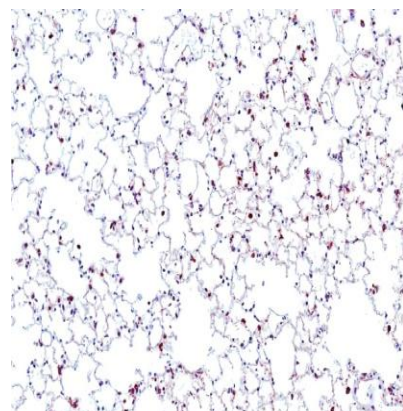

MAC-3  
24  
Weeks

Supplementary Figure 1C

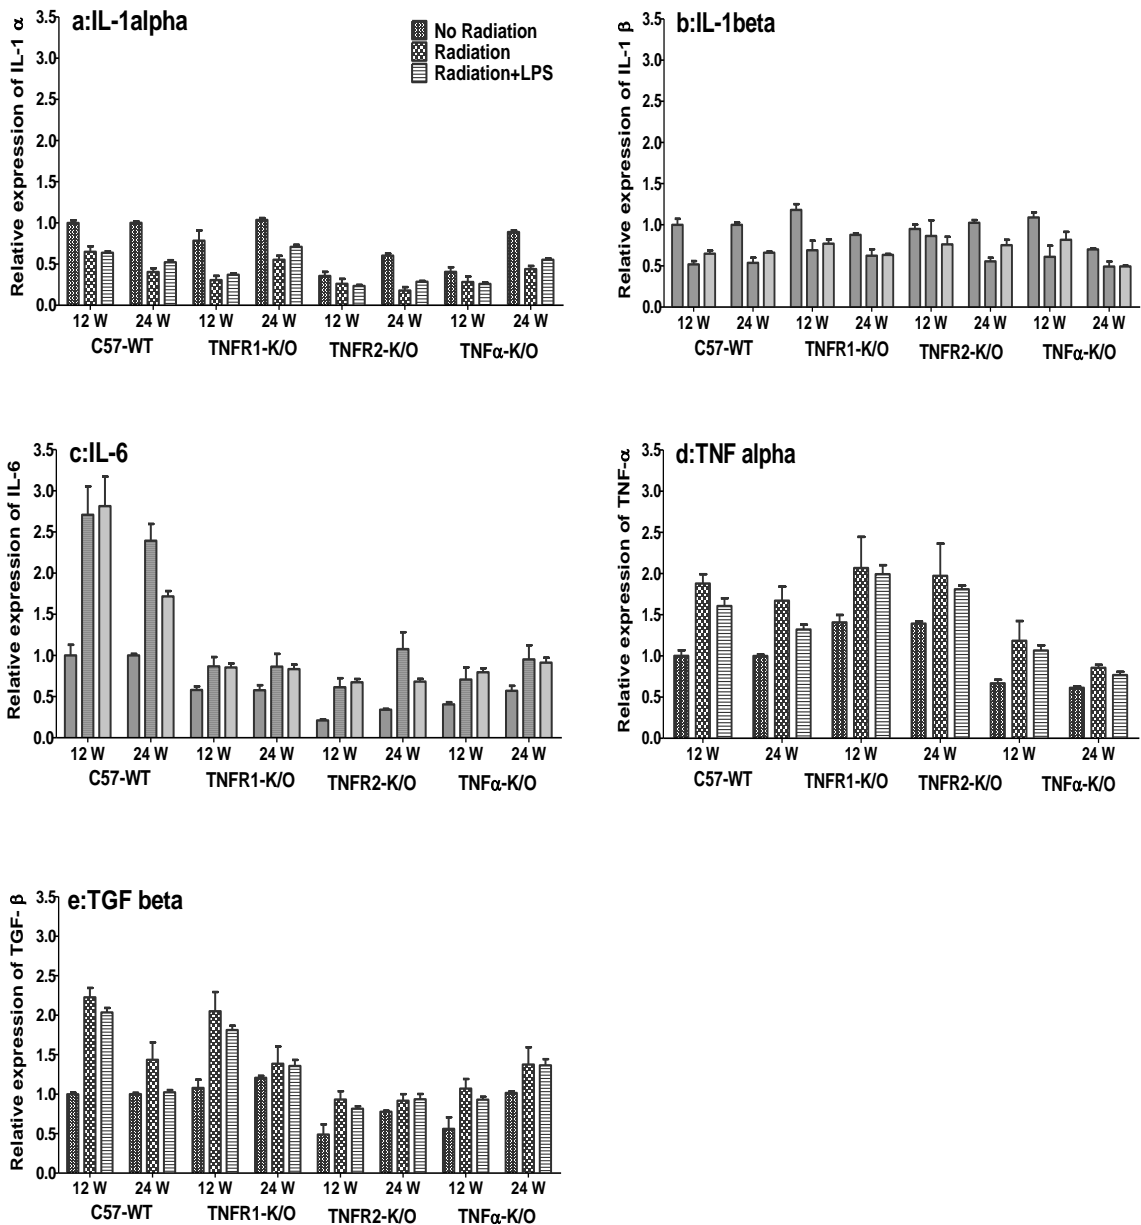

**Supplementary Figure. 2:** Expression of IL-1 $\alpha$  (a), IL-1 $\beta$  (b), IL-6 (c), TNF  $\alpha$  (d) and TGF $\beta$  (e) mRNA relative to GAPDH in the right lung of mice (6 mice per group) 12 and 24 weeks following lung irradiation (10Gy) with/without post-irradiation (within 1h) intratracheal administration of LPS. Each bar represents the mean ( $\pm$ SEM for 6 mice).
